# Supplementary material for: In Vitro Evaluation of the Therapeutic Potential of Phage VA7 against Enterotoxigenic Bacteroides fragilis Infection
Source: MDPI journal article supplement (doi:10.3390/v13102044), 2021-10-11
Supplement: s1 [file s1]

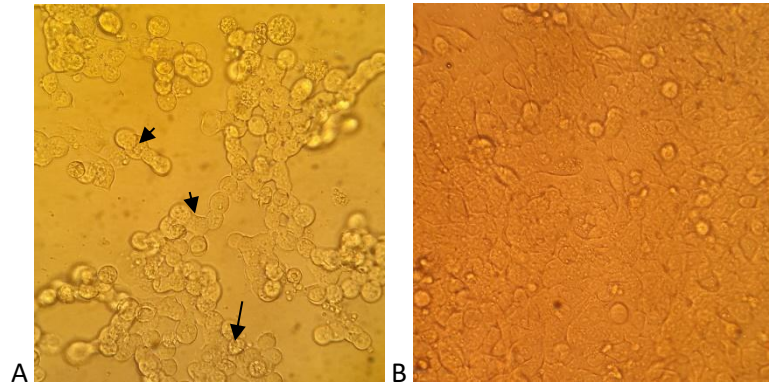

**Figure S2.** Cytotoxicity assay using colon cancer cells (CECs), adapted from Pantosi *et al.* Inverted microscope images of the cytotoxicity assay: (A) HCT116 CECs, after incubation during 2-4 h with the supernatant of enterotoxigenic *Bacteroides fragilis* strain E3. Arrows point at the rounded and detached epithelial cells (B) Unaffected spindle shaped, tightly joined HCT116 CECs after incubation with the supernatant of the nontoxigenic *B. fragilis* strain ATCC 25285<sup>T</sup>. Magnification  $\times 250$ . Pantosi, A.; Cerquetti, M.; Colangeli, R.; D'Ambrosio, F. Detection of intestinal and extra-intestinal strains of enterotoxigenic *Bacteroides fragilis* by the HT-29 cytotoxicity assay. *J. Med. Microbiol.* **1994**, *41*, 191-196.
