# Supplementary material for: In Vitro Evaluation of the Therapeutic Potential of Phage VA7 against Enterotoxigenic Bacteroides fragilis Infection
Source: MDPI journal article supplement (doi:10.3390/v13102044), 2021-10-11
Supplement: s1 [file s1]

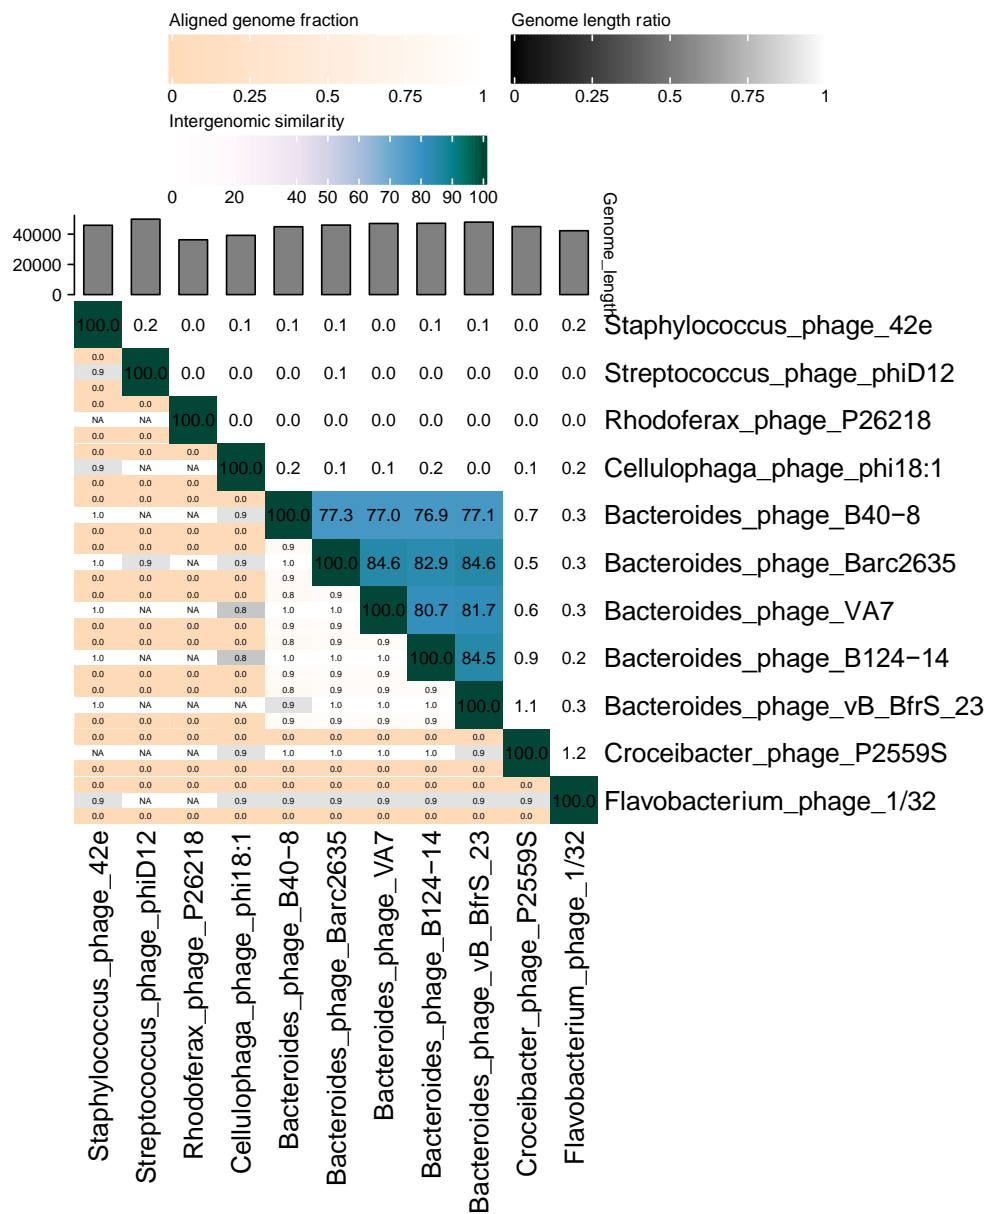

**Figure S1.** VIRIDIC (Virus Intergenomic Distance Calculator) heatmap comparing the phages most related to VA7. The legend shows the intergenomic similarity between each pair of two phages as a percentage of sequence identity. Phages sharing more than 70% identity are members of the same genus, thus showing VA7 belongs to the same genus as e.g., B124-14.
